# Supplementary material
Source: PubMed Central journal article supplement (PMC2819437)
Supplement: psb0412_1128SD1.pdf [file psb0412_1128SD1.pdf]

**Supplementary Table I** Number of cells/ml and cell size of *Vitis* cells grown for 7 days in control medium and in the absence of cytokinin (-CK). Values of cell number and cell size are means of 10 measurements taken randomly  $\pm$  SD. Different letters indicate significant differences at  $p < 0.05$ .

|         | Number of cells/ml<br>( $\times 10^5$ ) | Cell size<br>( $\mu\text{m}$ ) |
|---------|-----------------------------------------|--------------------------------|
| Control | 2.59 <sup>a</sup> $\pm$ 0.54            | 66 <sup>a</sup> $\pm$ 6.38     |
| -CK     | 2.58 <sup>a</sup> $\pm$ 0.54            | 51.67 <sup>b</sup> $\pm$ 10    |

**Supplementary Table II** Real-time PCR primers designed from *Arabidopsis* sequences and validated with *Vitis* genome.

| <i>Arabidopsis</i><br>protein | Initial Seq.<br>from data<br>base ( <i>Vitis</i> ) | Name<br>(Accession)  | Primer sequence                                                    | Sequences<br>tested by<br>Real-Time<br>PCR | Sequences<br>expressed<br>in <i>Vitis</i> |
|-------------------------------|----------------------------------------------------|----------------------|--------------------------------------------------------------------|--------------------------------------------|-------------------------------------------|
| HK's                          |                                                    |                      |                                                                    |                                            |                                           |
| AHK2                          | CU459264                                           | VvCyt1<br>(FJ822975) | 5' GAAGTGCTGAGACAGAGCTTGAATA 3'<br>5' CTCCATTGAATCTGTGCAGCTTAAC 3' | +                                          | +                                         |
| CRE1                          | CU459222                                           | VvCyt2               | 5' ATTCGAGACGAGTATGCACCTGTGA 3'<br>5' ATGATGAGAACCAAGCAGCCTGAAG 3' | +                                          | +                                         |
| AHK3                          | CU459353                                           | VvCyt3<br>(FJ822976) | 5' TAGCTGCTGGTGCATTGAAGAAGTA 3'<br>5' TCGACTATTGACGTTCCGTTCCATT 3' | +                                          | +                                         |
| AHP3                          |                                                    |                      |                                                                    |                                            |                                           |
|                               | CU459291                                           | VvHP1                | 5' CTGGCGGAGATAATACCAATGT 3'<br>5' ATGTATCTCGCATTACCTGAAC 3'       |                                            |                                           |
|                               | CU459224                                           | VvHP2<br>(FJ822977)  | 5' AATTCGTTTCAGCTGGAGGAAC 3'<br>5' TTCAGCTGTTGGAAGGTCTTCA 3'       | +                                          | +                                         |
|                               | AM484268                                           | VvHP3<br>(FJ822978)  | 5' CACAGCTTCAGCAACTACAAGA 3'<br>5' TTGTTGCTCCAACCTGAAGAGA 3'       | +                                          | +                                         |
|                               | CU459321                                           | VvHP4<br>(FJ822979)  | 5' GAATCTCCGAGGACTACTGATG 3'<br>5' AACAGTACTCGTGTTCGACAAG 3'       |                                            | +                                         |
| A-type RR17                   |                                                    |                      |                                                                    |                                            |                                           |
|                               | CU459263                                           | VvRRa1<br>(FJ822980) | 5' TGTATGCCTGGAATGACTGGAT 3'<br>5' TGGACGGTGGTGTATGATGATAA 3'      |                                            | +                                         |
|                               | CU459229                                           | VvRRa2<br>(FJ822981) | 5' TTGGGTTCCCTCCACCACTGTAT 3'<br>5' ACCTCCGATCCACATGGCTAT 3'       |                                            | +                                         |
|                               | CU459265                                           | VvRRa3<br>(FJ822982) | 5' AAGGAGGTTCCAGTTGTGATAA 3'<br>5' GCTTCTGTGCTTCAAGTAACAT 3'       | +                                          | +                                         |
|                               | CU459270                                           | VvRRa4<br>(FJ822983) | 5' ACTGGCTATGATCTCCTCAGAA 3'<br>5' GCTTGCTCACATCCGATAATTG 3'       | +                                          | +                                         |
| B-type RR18                   |                                                    |                      |                                                                    |                                            |                                           |
|                               | AM434392                                           | VvRRb1<br>(FJ822984) | 5' CAGACGTGGAATGAAGTCCTAA 3'<br>5' TCTGAGGTCTCTGGATCTACAA 3'       |                                            | +                                         |
|                               | AM432245                                           | VvRRb2               | 5' AACCAAGATTCCCTCGGCAACCT 3'<br>5' TACCTGCACCGTTGGCTTGATA 3'      |                                            | +                                         |
|                               | AM423607                                           | VvRRb3<br>(FJ822985) | 5' GATTACTCATGGTCTTGTGAC 3'<br>5' CTCATTCTTCTCCGTTCTCT 3'          |                                            | +                                         |
|                               | AM460059                                           | VvRRb4<br>(FJ822986) | 5' AGTAACCTTGATCCGAGTAGAA 3'<br>5' CTGCTGGAACAACATATCTTGA 3'       |                                            | +                                         |
|                               | CU459292                                           | VvRRb5<br>(FJ822987) | 5' TCGAGTTCTCGTGGTTCGATGA 3'<br>5' CATGCACCATGCTGAACACCTT 3'       | +                                          | +                                         |
|                               | CU459281                                           | VvRRb6<br>(FJ822988) | 5' TCCTGGTGGTTGATGATGATCC 3'<br>5' TGATAACAGGCAGGTCCATCTC 3'       | +                                          | +                                         |
| Apical<br>Meristem<br>genes   |                                                    |                      |                                                                    |                                            |                                           |
|                               | CU459300                                           | VvWus<br>(FJ822989)  | 5' CTGGACTCCTACAACCTGACCAGATA 3'<br>5' TTCTTGCCCTCGATCTTGCCGTA 3'  | +                                          | +                                         |

|                               |          |                     |                                                                    |   |   |
|-------------------------------|----------|---------------------|--------------------------------------------------------------------|---|---|
| Axillary<br>Meristem<br>genes | CU459218 | VvClv               | 5' TTCGGTTGTCGAACCTCCAAGGATT 3'<br>5' AAGTCAAGAACTCGGAGCGAACTCA 3' | + | + |
|                               | AM483920 | VvSTM               | 5' TCTATGGTGATGATGATGCCTCCTA 3'<br>5' ATGTTGCTGCTGTTGTTGTTGTTTC 3' | + | + |
|                               | CU459233 | VvBrc1              | 5' TCTCCTTCTTCTACTTTCCGTCTC 3'<br>5' TTGCGATCTCCTATTAGTTCATTGC 3'  | + | + |
|                               | CU459222 | VvBrc2              | 5' TGCCCGTAAGTTCTTTGATCTCCA 3'<br>5' GGTGAGTTCCTTGATTGCTGCTTTG 3'  | + | + |
|                               | CU459359 | VvLas<br>(FJ822990) | 5' GAGCCATGTCTGCTAGTGCTAATAC 3'<br>5' CCAGAATAGCTTGATTGGCAGTGAG 3' | + | + |
|                               | CU460733 | VvRax               | 5' GAGCTAACTACGTCAAGCAAGAGAT 3'<br>5' ATCTTGGTTCGGATGCACAGATACT 3' | + | + |
|                               | CU459220 | VvRev               | 5' AAGGCTACAGGAAGTCTGTCGATT 3'<br>5' TGCCACTCCACTGCAACTATGTGAA 3'  | + | + |

©2009 Landes Bioscience.  
Do not distribute.
